# Supplementary material
Source: PubMed Central journal article supplement (PMC3608733)
Supplement: NIHMS443743-supplement-1.pdf [file NIHMS443743-supplement-1.pdf]

# Supplemental Figure 1

## Primary CD4 Response

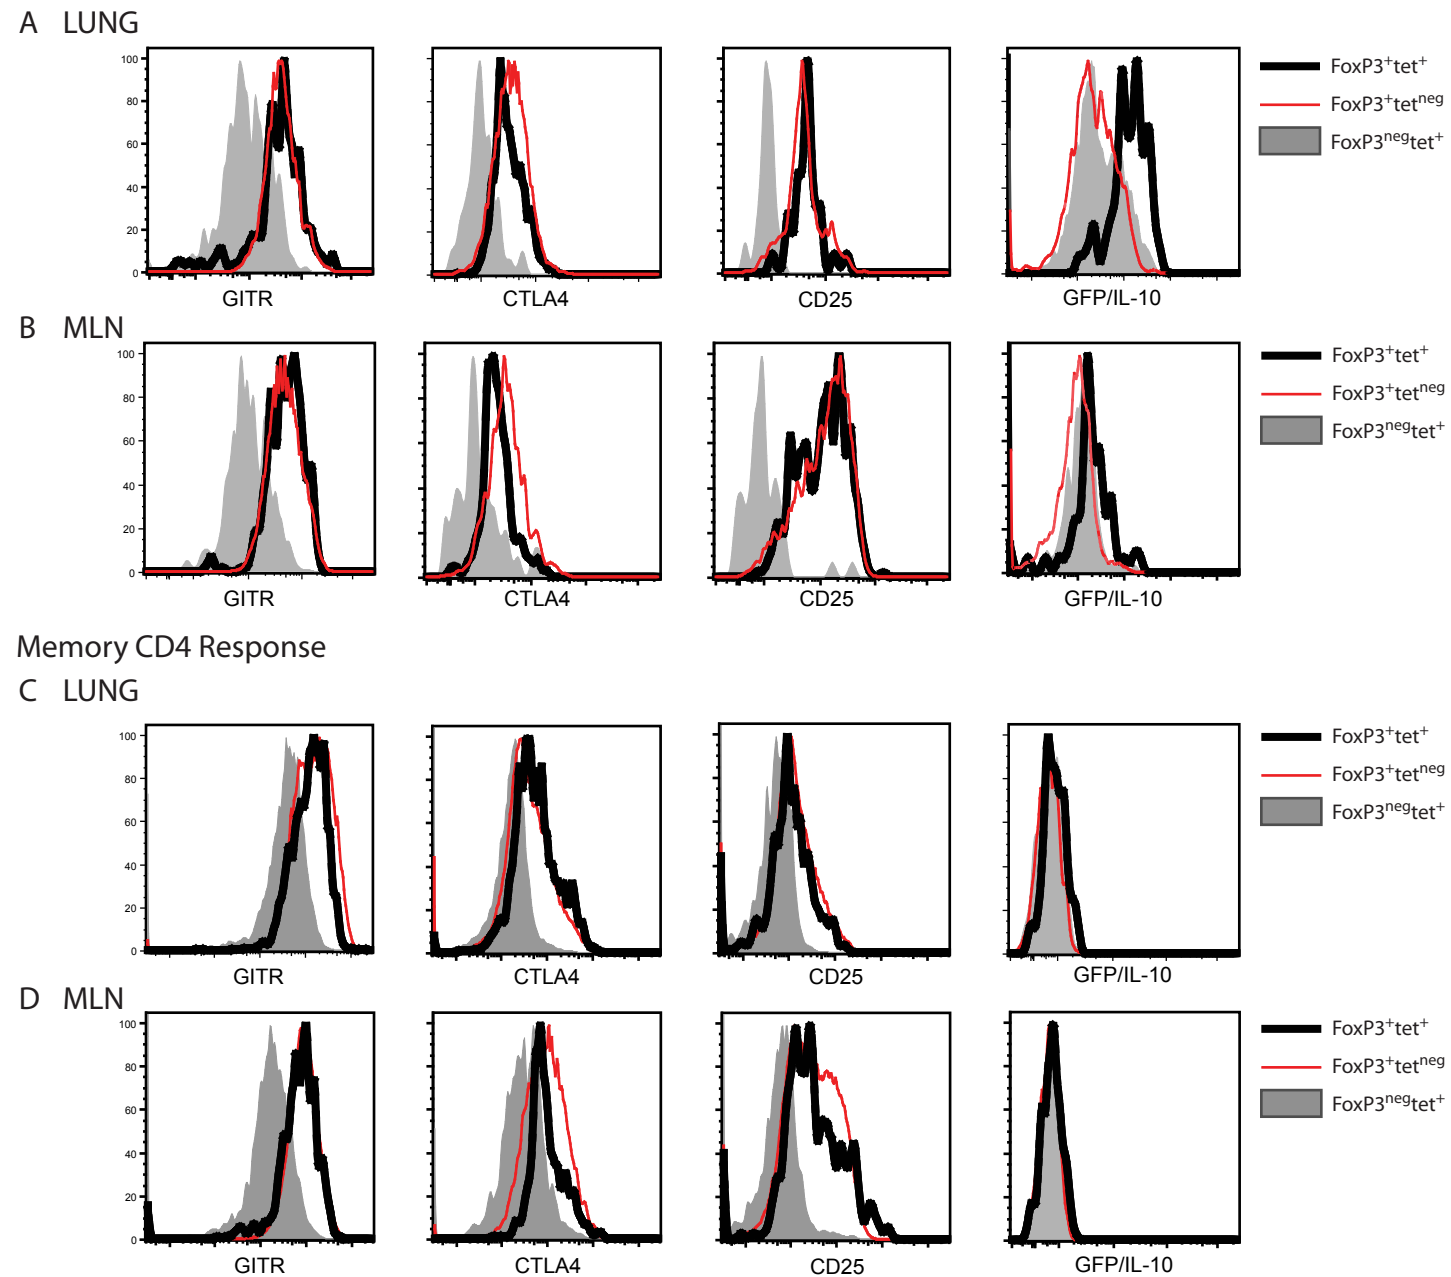

## Memory CD4 Response

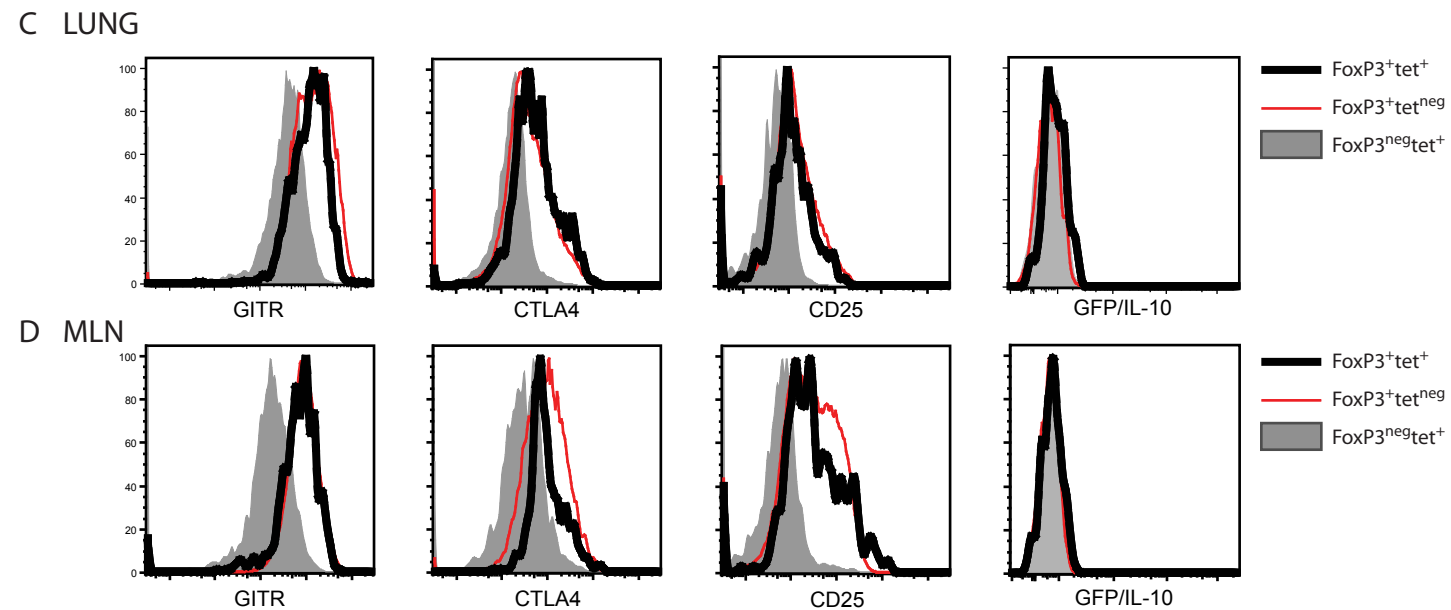

Supplemental Figure 1. Phenotype of Treg during the immune response to secondary influenza virus infection. C57BL/6 mice were sacrificed at various times after primary (600 EID50 PR8 influenza virus, rows A & B) or secondary (60,000 EID50 PR8 influenza virus, rows C & D) infection and lymphocytes harvested from the lung (A & C) or the lung-draining lymph node (B & D) were stained with anti-CD4, anti-FoxP3, and NP<sub>311-325</sub>/I-A<sup>b</sup> tetramer. Representative histograms for GITR, CTLA4, and CD25 expression on CD4<sup>+</sup>FoxP3<sup>+</sup>tetramer<sup>+</sup> cells (—), on CD4<sup>+</sup>FoxP3<sup>+</sup>tetramer<sup>neg</sup> (—), and CD4<sup>+</sup>FoxP3<sup>neg</sup>tetramer<sup>+</sup> (█) during the response to infection. Representative primary response plots were selected from samples harvested on day 8 or 10 post-challenge. Representative memory response plots were selected from samples harvested on day 4 or 6 post-challenge. IL-10 expression was measured by examining GFP expression in populations harvested from Vertex IL-10/GFP reporter mice. The data are representative of at least two independent experiments.
