# Supplementary material
Source: PubMed Central journal article supplement (PMC3608733)
Supplement: NIHMS443743-supplement-2.pdf [file NIHMS443743-supplement-2.pdf]

# Supplemental Figure 2.

A

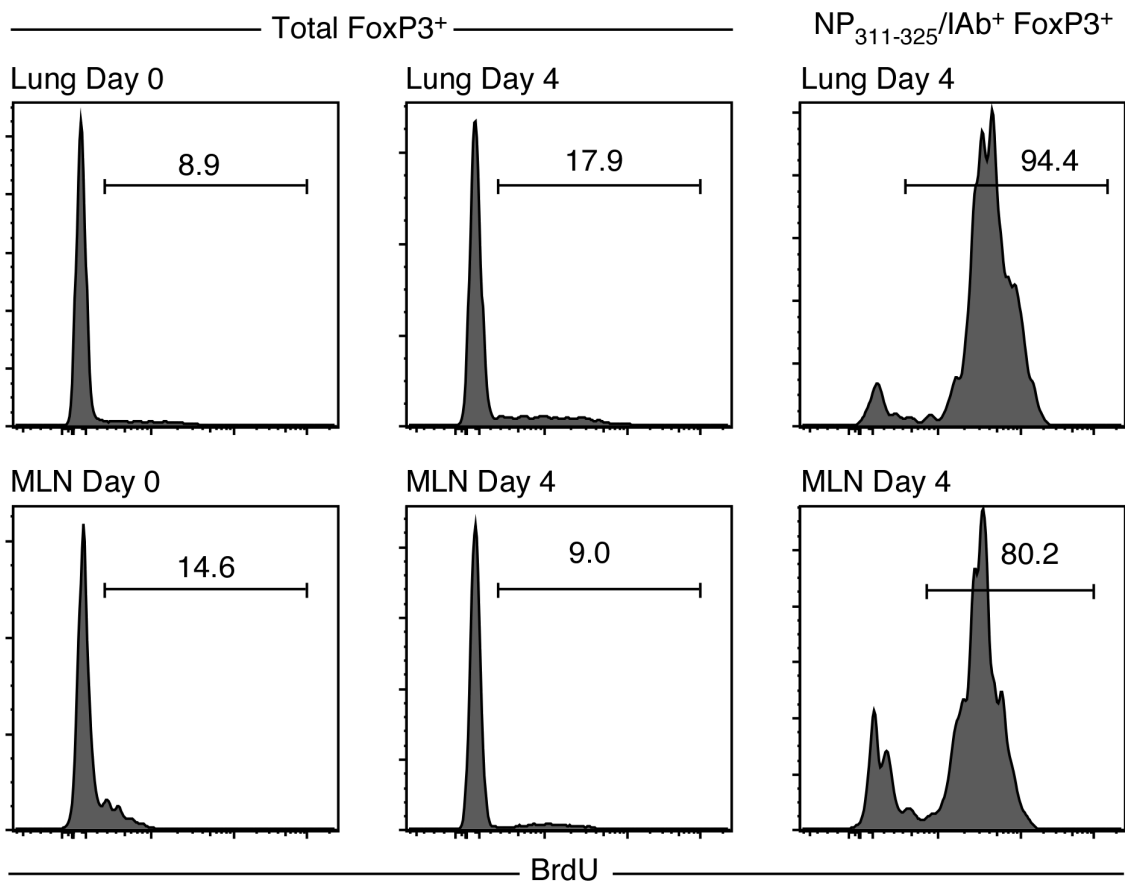

B

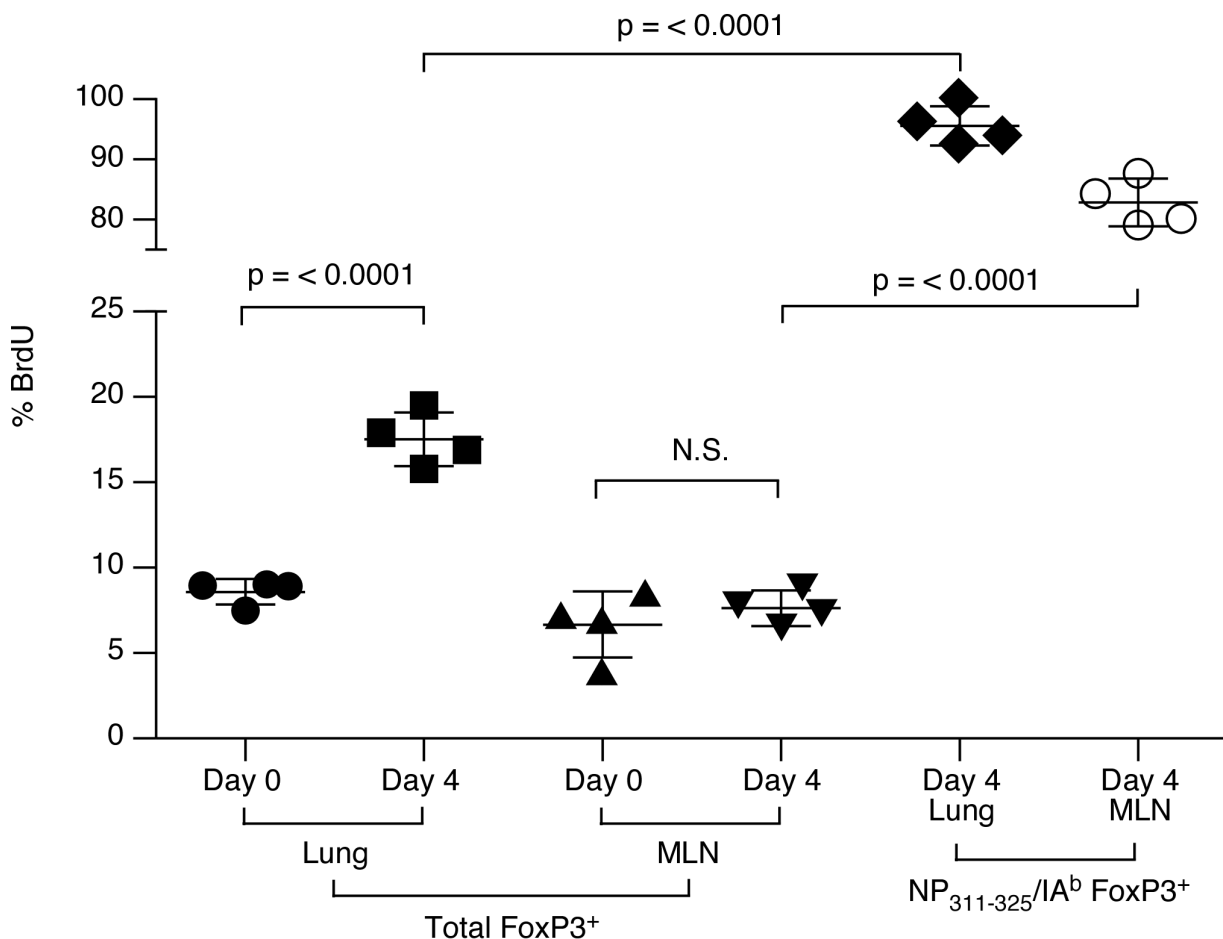

Supplemental Figure 2. Enhanced proliferation of Ag-specific Treg cells is observed in the lung after secondary challenge with influenza virus. C57BL/6 mice were infected with 3000 EID50 x31 influenza virus and allowed to rest for 35 days. Mice were treated with PC61 or isotype control, then challenged with 60,000 EID50 PR8 influenza virus and sacrificed at day 5 post-infection. (A) Representative staining of BrdU uptake in CD4<sup>+</sup>FoxP3<sup>+</sup> cells in the lung (top row) and lung-draining lymph node (bottom row) after infection. Column on right is representative staining of tet<sup>+</sup>CD4<sup>+</sup>FoxP3<sup>+</sup> cells. (B) The frequency of BrdU<sup>+</sup> cells among Treg cells in the lung and lung-draining lymph node. Data points represent individual mice. Lines indicate mean. Error bars represent standard deviation. The data are representative of two independent experiments with at least four mice per group per time point.
