# Supplementary material
Source: PubMed Central journal article supplement (PMC3608733)
Supplement: NIHMS443743-supplement-4.pdf [file NIHMS443743-supplement-4.pdf]

# Supplemental Figure 4

## CD4<sup>+</sup> regulators

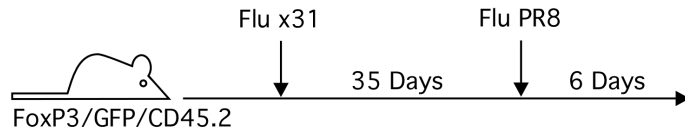

## CD8<sup>+</sup> memory effectors

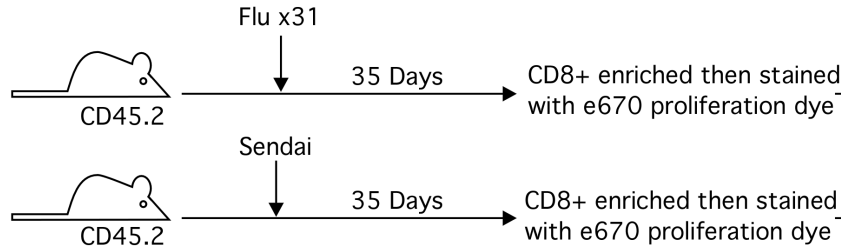

## APC targets

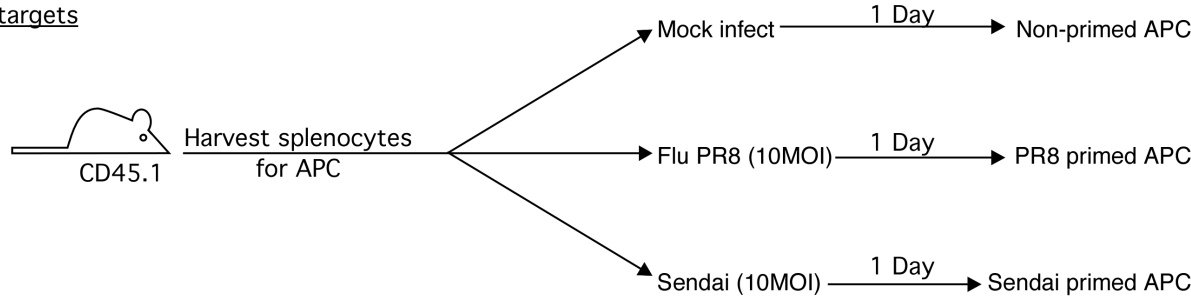

Culture 4 days and measure proliferation via dilution of e670 dye in CD8<sup>+</sup> population

|                                    |      |   |     |   |        |   |          |   |   |    |
|------------------------------------|------|---|-----|---|--------|---|----------|---|---|----|
| GFP <sup>+</sup> CD4 <sup>+</sup>  | +    |   | +   |   | +      |   |          |   |   |    |
| GFP <sup>-</sup> CD4 <sup>+</sup>  |      | + |     | + |        | + |          |   |   |    |
| e670 <sup>+</sup> CD8 <sup>+</sup> | +    | + | +   | + |        |   | +        | + |   |    |
| e670 <sup>+</sup> CD8 <sup>+</sup> |      |   |     |   |        | + | +        |   | + | +  |
| Non-primed APC                     | +    | + |     |   |        |   |          | + |   | +  |
| PR8 primed APC                     |      |   | +   | + |        |   |          |   | + |    |
| Sendai primed APC                  |      |   |     |   |        | + | +        |   |   | +  |
|                                    | 1    | 2 | 3   | 4 | 5      | 6 | 7        | 8 | 9 | 10 |
|                                    | Mock |   | Flu |   | Sendai |   | Controls |   |   |    |

Supplemental Figure 4. Schematic of in vitro proliferation assays from Figure 5. Experimental design of the source of CD4 regulatory cells, CD8 effector cells, and antigen presenting cells for the proliferation assay data from figure 5.
